# Supplementary material
Source: PubMed Central journal article supplement (PMC3719540)
Supplement: JB.00318-13_zjb999092692so1.pdf [file JB.00318-13_zjb999092692so1.pdf]

## Supplementary Material

Pages 1-19 Supplementary Tables S1-S2

Pages 20-21 Supplementary Figure S1-S2

### Supplementary Tables

**Table S1. Genes that are significantly downregulated in *AbrlR* biofilms compared to *P. aeruginosa* PAO1 biofilms.**

| PAO1 PA number     | Gene name   | Fold change<br>([ <i>brlR</i> mutant] vs [wild-type]) |
|--------------------|-------------|-------------------------------------------------------|
| PA2493             | <i>mexE</i> | -286.0                                                |
| PA2494             | <i>mexF</i> | -194.0                                                |
| PA4881             |             | -79.9                                                 |
| PA2759             |             | -65.8                                                 |
| PA4623             |             | -61.0                                                 |
| PA2495             | <i>oprN</i> | -54.6                                                 |
| PA3229             |             | -49.9                                                 |
| PA2850             | <i>ohr</i>  | -42.8                                                 |
| PA0532             |             | -39.4                                                 |
| PA1970             |             | -33.6                                                 |
| PA3496             |             | -29.2                                                 |
| PA0874             |             | -24.1                                                 |
| PA4084             |             | -18.6                                                 |
| PA1393             | <i>cysC</i> | -16.0                                                 |
| PA3218             |             | -16.0                                                 |
| ig 4956733 4956028 |             | -15.8                                                 |
| PA1343             |             | -15.0                                                 |
| PA0128             |             | -13.3                                                 |
| PA0160             |             | -13.3                                                 |
| ig 3475169 3475955 |             | -12.0                                                 |
| ig 5308424 5309325 |             | -12.0                                                 |
| PA4033             |             | -11.8                                                 |
| PA4354             |             | -10.1                                                 |
| Pae tRNA Leu s     |             | -10.1                                                 |
| PA3591             |             | -9.9                                                  |
| PA2808             |             | -9.5                                                  |
| PA1942             |             | -9.2                                                  |
| PA2501             |             | -9.2                                                  |
| PA4683             |             | -9.1                                                  |
| PA2853             | <i>oprI</i> | -9.0                                                  |
| PA0425             | <i>mexA</i> | -9.0                                                  |
| PA0426             | <i>mexB</i> | -8.9                                                  |
| PA4612             |             | -8.9                                                  |
| PA2491             |             | -8.8                                                  |

|                    |              |      |
|--------------------|--------------|------|
| PA0714             |              | -8.5 |
| PA5404             |              | -8.5 |
| PA2350             |              | -8.4 |
| PA0713             |              | -8.1 |
| ig 3087490 3088659 |              | -8.0 |
| PA1747             |              | -7.7 |
| PA2486             |              | -7.7 |
| PA2849             |              | -7.7 |
| PA3051             |              | -7.7 |
| PA1963             |              | -7.5 |
| PA5102             |              | -7.5 |
| PA4611             |              | -7.3 |
| ig 4629184 4629943 |              | -7.3 |
| ig 5243177 5242558 |              | -7.1 |
| Pae tRNA Asn s     |              | -7.0 |
| PA0823             |              | -6.9 |
| PA2835             |              | -6.9 |
| PA4621             |              | -6.9 |
| PA0982             |              | -6.7 |
| PA4121             |              | -6.6 |
| ig 629884 630527   |              | -6.5 |
| PA3531             | <i>bfrB</i>  | -6.4 |
| PA0427             | <i>oprM</i>  | -6.4 |
| PA4139             |              | -6.4 |
| PA1498             | <i>pykF</i>  | -6.2 |
| PA5348             |              | -6.2 |
| PA4836             |              | -6.1 |
| PA1431             | <i>rsaL</i>  | -6.0 |
| PA3309             |              | -6.0 |
| PA3621             | <i>fdxA</i>  | -6.0 |
| PA4596             |              | -6.0 |
| PA1690             | <i>pscU</i>  | -5.8 |
| PA4166             |              | -5.7 |
| PA0491             |              | -5.6 |
| PA4898             |              | -5.6 |
| Pae tRNA Ala f     |              | -5.6 |
| PA1168             |              | -5.4 |
| PA2619             | <i>infA</i>  | -5.4 |
| PA2826             |              | -5.4 |
| Pae tRNA Cys i     |              | -5.4 |
| PA5191             |              | -5.3 |
| PA5352             |              | -5.3 |
| PA0906             |              | -5.2 |
| PA3009             |              | -5.2 |
| ig 5541409 5542072 |              | -5.2 |
| PA0978             |              | -5.1 |
| PA3840             |              | -5.1 |
| PA0453             |              | -4.9 |
| PA1333             |              | -4.9 |
| PA1347             |              | -4.8 |
| PA2805             |              | -4.8 |
| PA3524             | <i>gloA1</i> | -4.8 |
| ig 5242558 5243177 |              | -4.8 |
| ig 901934 901046   |              | -4.8 |

|                      |              |      |
|----------------------|--------------|------|
| PA0499               |              | -4.7 |
| PA1159               |              | -4.7 |
| PA2556               |              | -4.7 |
| PA3031               |              | -4.7 |
| PA0443               |              | -4.6 |
| PA2827               |              | -4.6 |
| PA3006               |              | -4.6 |
| PA4878               |              | -4.6 |
| Pae tRNA Phe f       |              | -4.6 |
| PA0826               |              | -4.5 |
| PA2807               |              | -4.5 |
| PA4571               |              | -4.5 |
| PA5446               |              | -4.5 |
| ig 2558918 2557964 s |              | -4.5 |
| PA0683               |              | -4.4 |
| PA1673               |              | -4.4 |
| PA1830               |              | -4.4 |
| ig 546334 545644     |              | -4.4 |
| PA1414               |              | -4.3 |
| PA1744               |              | -4.3 |
| PA2819               |              | -4.3 |
| PA4356               | <i>xenB</i>  | -4.3 |
| PA4697               |              | -4.3 |
| PA1076               |              | -4.2 |
| PA1633               | <i>kdpA</i>  | -4.2 |
| PA2755               | <i>eco</i>   | -4.2 |
| PA0523               | <i>norC</i>  | -4.1 |
| PA0529               |              | -4.1 |
| PA0579               | <i>rpsU</i>  | -4.1 |
| PA0918               |              | -4.1 |
| PA1053               |              | -4.1 |
| PA1123               |              | -4.1 |
| PA1309               |              | -4.1 |
| PA2128               |              | -4.1 |
| PA3067               |              | -4.1 |
| PA4737               |              | -4.1 |
| Pae tRNA Val f       |              | -4.1 |
| ig 2893827 2894451   |              | -4.1 |
| ig 630527 629884     |              | -4.1 |
| PA0464               | <i>creC</i>  | -4.0 |
| PA3915               | <i>moaB1</i> | -4.0 |
| PA4577               |              | -4.0 |
| PA2582               |              | -3.9 |
| PA2851               | <i>efp</i>   | -3.9 |
| PA3572               |              | -3.9 |
| PA4575               |              | -3.9 |
| PA0867               |              | -3.8 |
| PA2622               | <i>cspD</i>  | -3.8 |
| PA3136               |              | -3.8 |
| PA3412               |              | -3.8 |
| PA5288               | <i>glnK</i>  | -3.8 |
| PA5407               |              | -3.8 |
| PA2801               |              | -3.7 |
| PA3880               |              | -3.7 |

|                    |             |      |
|--------------------|-------------|------|
| PA4610             |             | -3.7 |
| PA0822             |             | -3.6 |
| PA1743             |             | -3.6 |
| PA1761             |             | -3.6 |
| PA2506             |             | -3.6 |
| PA4591             |             | -3.6 |
| PA4870             |             | -3.6 |
| PA4876             | <i>osmE</i> | -3.6 |
| PA4877             |             | -3.6 |
| Pae 5SrRNA s       |             | -3.6 |
| PA0181             |             | -3.5 |
| PA0237             |             | -3.5 |
| PA0505             |             | -3.5 |
| PA1579             |             | -3.5 |
| PA1695             | <i>pscP</i> | -3.5 |
| PA1936             |             | -3.5 |
| PA2016             |             | -3.5 |
| PA2174             |             | -3.5 |
| PA2668             |             | -3.5 |
| PA2738             | <i>himA</i> | -3.5 |
| PA2753             |             | -3.5 |
| PA4063             |             | -3.5 |
| PA4614             | <i>mscL</i> | -3.5 |
| PA5285             |             | -3.5 |
| PA5385             |             | -3.5 |
| PA0234             |             | -3.4 |
| PA1185             |             | -3.4 |
| PA1847             |             | -3.4 |
| PA2132             |             | -3.4 |
| PA2825             |             | -3.4 |
| PA2953             |             | -3.4 |
| PA4587             | <i>ccpR</i> | -3.4 |
| PA4874             |             | -3.4 |
| PA5226             |             | -3.4 |
| PA5308             | <i>lrp</i>  | -3.4 |
| ig 3206252 3206914 |             | -3.4 |
| PA0320             |             | -3.3 |
| PA1749             |             | -3.3 |
| PA1852             |             | -3.3 |
| PA2761             |             | -3.3 |
| PA4031             | <i>ppa</i>  | -3.3 |
| PA4738             |             | -3.3 |
| PA5316             | <i>rpmB</i> | -3.3 |
| PA0359             |             | -3.2 |
| PA1198             |             | -3.2 |
| PA1366             |             | -3.2 |
| PA1571             |             | -3.2 |
| PA1884             |             | -3.2 |
| PA1965             |             | -3.2 |
| PA2960             | <i>pilZ</i> | -3.2 |
| PA3894             |             | -3.2 |
| PA4104             |             | -3.2 |
| PA4235             | <i>bfr</i>  | -3.2 |
| PA4731             | <i>panD</i> | -3.2 |

|                    |             |      |
|--------------------|-------------|------|
| PA5148             |             | -3.2 |
| PA5315             | <i>rpmG</i> | -3.2 |
| PA5416             | <i>soxB</i> | -3.2 |
| Pae tRNA Ile f     |             | -3.2 |
| PA0012             |             | -3.1 |
| PA0200 i           |             | -3.1 |
| PA0238             |             | -3.1 |
| PA0515             |             | -3.1 |
| PA0526             |             | -3.1 |
| PA0941             |             | -3.1 |
| PA1172             | <i>napC</i> | -3.1 |
| PA2422             |             | -3.1 |
| PA2757             |             | -3.1 |
| PA2813             |             | -3.1 |
| PA3757             |             | -3.1 |
| PA4086             |             | -3.1 |
| PA4146             |             | -3.1 |
| PA4315             | <i>mvaT</i> | -3.1 |
| PA4463             |             | -3.1 |
| PA5353             | <i>glcF</i> | -3.1 |
| PA5410             |             | -3.1 |
| PA5467             |             | -3.1 |
| ig 1205771 1204781 |             | -3.1 |
| ig 6090705 6092045 |             | -3.1 |
| PA0125             |             | -3.0 |
| PA0243             |             | -3.0 |
| PA1564             |             | -3.0 |
| PA1604             |             | -3.0 |
| PA2485             |             | -3.0 |
| PA2663             |             | -3.0 |
| PA3205             |             | -3.0 |
| PA3394             | <i>nosF</i> | -3.0 |
| PA3740             |             | -3.0 |
| PA4326             |             | -3.0 |
| PA4421             |             | -3.0 |
| PA4568             | <i>rplU</i> | -3.0 |
| PA4607             |             | -3.0 |
| PA4980             |             | -3.0 |
| PA0219             |             | -2.9 |
| PA0252             |             | -2.9 |
| PA0656             |             | -2.9 |
| PA0827             |             | -2.9 |
| PA1034             |             | -2.9 |
| PA1195             |             | -2.9 |
| PA2375             |             | -2.9 |
| PA2567             |             | -2.9 |
| PA2754             |             | -2.9 |
| PA2899             |             | -2.9 |
| PA3451             |             | -2.9 |
| PA3530             |             | -2.9 |
| PA3842             |             | -2.9 |
| PA3990             |             | -2.9 |
| PA4473             |             | -2.9 |
| PA4641             |             | -2.9 |

|                      |              |      |
|----------------------|--------------|------|
| PA5137               |              | -2.9 |
| PA5347               |              | -2.9 |
| PA5355               | <i>glcD</i>  | -2.9 |
| PA5388               |              | -2.9 |
| PA5431               |              | -2.9 |
| ig 1948502 1947041   |              | -2.9 |
| PA0518               | <i>nirM</i>  | -2.8 |
| PA0519               | <i>nirS</i>  | -2.8 |
| PA0654               | <i>speD</i>  | -2.8 |
| PA0806               |              | -2.8 |
| PA1035               |              | -2.8 |
| PA1132               |              | -2.8 |
| PA1328               |              | -2.8 |
| PA1348               |              | -2.8 |
| PA1592               |              | -2.8 |
| PA1999               |              | -2.8 |
| PA2065               | <i>pcoA</i>  | -2.8 |
| PA2082               |              | -2.8 |
| PA2460               |              | -2.8 |
| PA2484               |              | -2.8 |
| PA2517               | <i>xylY</i>  | -2.8 |
| PA2719               |              | -2.8 |
| PA2812               |              | -2.8 |
| PA2880               |              | -2.8 |
| PA2883               |              | -2.8 |
| PA3055               |              | -2.8 |
| PA3337               | <i>rfaD</i>  | -2.8 |
| PA3819               |              | -2.8 |
| PA4395               |              | -2.8 |
| PA4764               | <i>fur</i>   | -2.8 |
| PA4989               |              | -2.8 |
| PA5062               |              | -2.8 |
| PA5230               |              | -2.8 |
| PA5240               | <i>trxA</i>  | -2.8 |
| PA5246               |              | -2.8 |
| PA5274               | <i>rnk</i>   | -2.8 |
| PA5300               | <i>cycB</i>  | -2.8 |
| ig 2281578 2282480   |              | -2.8 |
| ig 2557964 2558918 s |              | -2.8 |
| PA0224               |              | -2.7 |
| PA0245               | <i>aroQ2</i> | -2.7 |
| PA0514               | <i>nirL</i>  | -2.7 |
| PA0821               |              | -2.7 |
| PA0983               |              | -2.7 |
| PA1550               |              | -2.7 |
| PA1746               |              | -2.7 |
| PA3046               |              | -2.7 |
| PA3216               |              | -2.7 |
| PA3338               |              | -2.7 |
| PA3392               | <i>nosZ</i>  | -2.7 |
| PA3533               |              | -2.7 |
| PA3841               | <i>exoS</i>  | -2.7 |
| PA4466               |              | -2.7 |
| PA4739               |              | -2.7 |

|                    |             |      |
|--------------------|-------------|------|
| PA5254             |             | -2.7 |
| PA5332             | <i>crc</i>  | -2.7 |
| ig 1996806 1997509 |             | -2.7 |
| ig 3526677 3527428 |             | -2.7 |
| PA0315             |             | -2.6 |
| PA0574             |             | -2.6 |
| PA0731             |             | -2.6 |
| PA1191             |             | -2.6 |
| PA1315             |             | -2.6 |
| PA1748             |             | -2.6 |
| PA1789             |             | -2.6 |
| PA1831             |             | -2.6 |
| PA2666             |             | -2.6 |
| PA2675             |             | -2.6 |
| PA2783             |             | -2.6 |
| PA2935             |             | -2.6 |
| PA3601             |             | -2.6 |
| PA3662             |             | -2.6 |
| PA4765             | <i>omlA</i> | -2.6 |
| PA5026             |             | -2.6 |
| PA5127             |             | -2.6 |
| PA5289             |             | -2.6 |
| PA5533             |             | -2.6 |
| ig 2342493 2341640 |             | -2.6 |
| PA0141             |             | -2.5 |
| PA0162             |             | -2.5 |
| PA0310             |             | -2.5 |
| PA0329             |             | -2.5 |
| PA0406             |             | -2.5 |
| PA0560             |             | -2.5 |
| PA0709             |             | -2.5 |
| PA0916             |             | -2.5 |
| PA1388             |             | -2.5 |
| PA1471             |             | -2.5 |
| PA1574             |             | -2.5 |
| PA1603             |             | -2.5 |
| PA1793             | <i>ppiB</i> | -2.5 |
| PA1968             |             | -2.5 |
| PA2031             |             | -2.5 |
| PA2126             |             | -2.5 |
| PA2380             |             | -2.5 |
| PA2718             |             | -2.5 |
| PA3385             |             | -2.5 |
| PA3497             |             | -2.5 |
| PA3584             | <i>glpD</i> | -2.5 |
| PA3717             |             | -2.5 |
| PA3965             |             | -2.5 |
| PA4348             |             | -2.5 |
| PA4441             |             | -2.5 |
| PA4459             |             | -2.5 |
| PA4620             |             | -2.5 |
| PA4711             |             | -2.5 |
| PA4736             |             | -2.5 |
| PA5039             | <i>aroK</i> | -2.5 |

|                    |             |      |
|--------------------|-------------|------|
| PA5351             |             | -2.5 |
| ig 3116653 3115632 |             | -2.5 |
| ig 4326394 4327696 |             | -2.5 |
| ig 69272 68616     |             | -2.5 |
| PA0019             | <i>def</i>  | -2.4 |
| PA0021             |             | -2.4 |
| PA0117             |             | -2.4 |
| PA0225             |             | -2.4 |
| PA0511             | <i>nirJ</i> | -2.4 |
| PA0520             | <i>nirQ</i> | -2.4 |
| PA0791             |             | -2.4 |
| PA0905             | <i>csrA</i> | -2.4 |
| PA0995             | <i>ogt</i>  | -2.4 |
| PA1008             | <i>bcp</i>  | -2.4 |
| PA1100             | <i>fliE</i> | -2.4 |
| PA1110             |             | -2.4 |
| PA1119             |             | -2.4 |
| PA1269             |             | -2.4 |
| PA1518             |             | -2.4 |
| PA1533             |             | -2.4 |
| PA1692             |             | -2.4 |
| PA1725             | <i>pscL</i> | -2.4 |
| PA1835             |             | -2.4 |
| PA1863             | <i>modA</i> | -2.4 |
| PA1967             |             | -2.4 |
| PA2029             |             | -2.4 |
| PA2190             |             | -2.4 |
| PA2625             |             | -2.4 |
| PA2989             |             | -2.4 |
| PA3248             |             | -2.4 |
| PA3347             |             | -2.4 |
| PA3430             |             | -2.4 |
| PA3517             |             | -2.4 |
| PA3602             |             | -2.4 |
| PA3843             |             | -2.4 |
| PA4198             |             | -2.4 |
| PA4569             | <i>ispB</i> | -2.4 |
| PA4592             |             | -2.4 |
| PA4661             |             | -2.4 |
| PA4856             |             | -2.4 |
| PA5028             |             | -2.4 |
| PA5029             |             | -2.4 |
| PA5066             | <i>hisI</i> | -2.4 |
| PA5178             |             | -2.4 |
| PA5179             |             | -2.4 |
| PA5208             |             | -2.4 |
| PA5227             |             | -2.4 |
| PA5233             |             | -2.4 |
| PA5292             |             | -2.4 |
| PA5301             |             | -2.4 |
| PA5306             |             | -2.4 |
| PA5371             |             | -2.4 |
| ig 2901558 2902217 |             | -2.4 |
| ig 53521 56546     |             | -2.4 |



|                    |             |      |
|--------------------|-------------|------|
| PA0015             |             | -2.3 |
| PA0139             | <i>ahpC</i> | -2.3 |
| PA0250             |             | -2.3 |
| PA0362             | <i>fdxI</i> | -2.3 |
| PA0363             | <i>coaD</i> | -2.3 |
| PA0456             |             | -2.3 |
| PA0541             |             | -2.3 |
| PA0544             |             | -2.3 |
| PA0833             |             | -2.3 |
| PA0937             |             | -2.3 |
| PA0940             |             | -2.3 |
| PA1354             |             | -2.3 |
| PA1490             |             | -2.3 |
| PA1526             |             | -2.3 |
| PA1556             |             | -2.3 |
| PA1706             | <i>pcrV</i> | -2.3 |
| PA1913             |             | -2.3 |
| PA1954             |             | -2.3 |
| PA2637             | <i>nuoA</i> | -2.3 |
| PA2667             |             | -2.3 |
| PA2820             |             | -2.3 |
| PA2834             |             | -2.3 |
| PA2970             | <i>rpmF</i> | -2.3 |
| PA3033             |             | -2.3 |
| PA3276             |             | -2.3 |
| PA3463             |             | -2.3 |
| PA3495             | <i>nth</i>  | -2.3 |
| PA3529             |             | -2.3 |
| PA3610             | <i>potD</i> | -2.3 |
| PA3791             |             | -2.3 |
| PA3833             |             | -2.3 |
| PA3927             |             | -2.3 |
| PA3959             |             | -2.3 |
| PA4080             |             | -2.3 |
| PA4111             |             | -2.3 |
| PA4135             |             | -2.3 |
| PA4306             |             | -2.3 |
| PA4391             |             | -2.3 |
| PA4753             |             | -2.3 |
| PA4784             |             | -2.3 |
| PA4987             |             | -2.3 |
| PA5049             | <i>rpmE</i> | -2.3 |
| PA5116             |             | -2.3 |
| PA5120             |             | -2.3 |
| PA5157             |             | -2.3 |
| PA5228             |             | -2.3 |
| PA5437             |             | -2.3 |
| PA5475             |             | -2.3 |
| ig 3115632 3116653 |             | -2.3 |
| PA0020             |             | -2.2 |
| PA0034             |             | -2.2 |
| PA0038             |             | -2.2 |
| PA0050             |             | -2.2 |
| PA0376             | <i>rpoH</i> | -2.2 |

|                    |              |      |
|--------------------|--------------|------|
| PA0436             |              | -2.2 |
| PA0449             |              | -2.2 |
| PA0463             | <i>creB</i>  | -2.2 |
| PA0512             |              | -2.2 |
| PA0542             |              | -2.2 |
| PA0797             |              | -2.2 |
| PA0839             |              | -2.2 |
| PA0868             |              | -2.2 |
| PA0921             |              | -2.2 |
| PA0960             |              | -2.2 |
| PA1065             |              | -2.2 |
| PA1137             |              | -2.2 |
| PA1705             | <i>pcrG</i>  | -2.2 |
| PA1741             |              | -2.2 |
| PA1769             |              | -2.2 |
| PA1978             |              | -2.2 |
| PA2379             |              | -2.2 |
| PA2580             |              | -2.2 |
| PA2591             |              | -2.2 |
| PA2730             |              | -2.2 |
| PA2737             |              | -2.2 |
| PA2742             | <i>rpmI</i>  | -2.2 |
| PA2821             |              | -2.2 |
| PA3453             |              | -2.2 |
| PA3979             |              | -2.2 |
| PA4399             |              | -2.2 |
| PA4461             |              | -2.2 |
| PA4578             |              | -2.2 |
| PA4723             | <i>dksA</i>  | -2.2 |
| PA5055             |              | -2.2 |
| PA5060             | <i>phaF</i>  | -2.2 |
| PA5152             |              | -2.2 |
| PA5182             |              | -2.2 |
| PA5354             | <i>glcE</i>  | -2.2 |
| PA5406             |              | -2.2 |
| PA5462             |              | -2.2 |
| PA5494             |              | -2.2 |
| PA5515             |              | -2.2 |
| ig 2068728 2069490 |              | -2.2 |
| ig 3545073 3545880 |              | -2.2 |
| PA0044             | <i>exoT</i>  | -2.1 |
| PA0384             |              | -2.1 |
| PA0394             |              | -2.1 |
| PA0398             |              | -2.1 |
| PA0559             |              | -2.1 |
| PA0565             |              | -2.1 |
| PA0876             |              | -2.1 |
| PA0955             |              | -2.1 |
| PA1070             | <i>braG</i>  | -2.1 |
| PA1435             |              | -2.1 |
| PA1674             | <i>folE2</i> | -2.1 |
| PA1696             | <i>pscO</i>  | -2.1 |
| PA1806             | <i>fabI</i>  | -2.1 |
| PA2127             |              | -2.1 |

|                    |             |      |
|--------------------|-------------|------|
| PA2457             |             | -2.1 |
| PA2864             |             | -2.1 |
| PA3369             |             | -2.1 |
| PA3435             |             | -2.1 |
| PA3522             |             | -2.1 |
| PA3585             | <i>glpM</i> | -2.1 |
| PA3748             |             | -2.1 |
| PA3764             |             | -2.1 |
| PA3765             |             | -2.1 |
| PA3978             |             | -2.1 |
| PA4360             |             | -2.1 |
| PA4460             |             | -2.1 |
| PA4493             |             | -2.1 |
| PA4517             |             | -2.1 |
| PA4546             | <i>pilS</i> | -2.1 |
| PA4567             | <i>rpmA</i> | -2.1 |
| PA4639             |             | -2.1 |
| PA4768             | <i>smpA</i> | -2.1 |
| PA5020             |             | -2.1 |
| PA5027             |             | -2.1 |
| PA5133             |             | -2.1 |
| PA5183             |             | -2.1 |
| PA5195             |             | -2.1 |
| PA5396             |             | -2.1 |
| PA5411             |             | -2.1 |
| PA5492             |             | -2.1 |
| ig 2918966 2918211 |             | -2.1 |
| ig 3546926 3547688 |             | -2.1 |
| ig 5542072 5541409 |             | -2.1 |
| ig 721556 727608 s |             | -2.1 |
| PA0409             | <i>pilH</i> | -2.0 |
| PA0943             |             | -2.0 |
| PA0985             |             | -2.0 |
| PA1013             | <i>purC</i> | -2.0 |
| PA1263             |             | -2.0 |
| PA1517             |             | -2.0 |
| PA1520             |             | -2.0 |
| PA1618             |             | -2.0 |
| PA1718             | <i>pscE</i> | -2.0 |
| PA2119             |             | -2.0 |
| PA2318             |             | -2.0 |
| PA2577             |             | -2.0 |
| PA2780             |             | -2.0 |
| PA2992             |             | -2.0 |
| PA3243             | <i>minC</i> | -2.0 |
| PA3289             |             | -2.0 |
| PA3523             |             | -2.0 |
| PA3639             | <i>accA</i> | -2.0 |
| PA3808             |             | -2.0 |
| PA3874             | <i>narH</i> | -2.0 |
| PA4040             |             | -2.0 |
| PA4197             |             | -2.0 |
| PA4377             |             | -2.0 |
| PA4398             |             | -2.0 |

|                    |             |      |
|--------------------|-------------|------|
| PA4403             | <i>secA</i> | -2.0 |
| PA4865             | <i>ureA</i> | -2.0 |
| PA5045             | <i>ponA</i> | -2.0 |
| PA5232             |             | -2.0 |
| PA5362             |             | -2.0 |
| ig 5207621 5208463 |             | -2.0 |

**Table S2. Genes that are significantly upregulated in *AbrlR* biofilms compared to *P. aeruginosa* PAO1 biofilms.**

| PAO1 PA number | Gene name   | Fold change<br>([ <i>brlR</i> mutant] vs [wild-type]) |
|----------------|-------------|-------------------------------------------------------|
| PA0283         | <i>sbp</i>  | 2.0                                                   |
| PA0764         | <i>mucB</i> | 2.0                                                   |
| PA1134         |             | 2.0                                                   |
| PA2008         | <i>fahA</i> | 2.0                                                   |
| PA2112         |             | 2.0                                                   |
| PA3415         |             | 2.0                                                   |
| PA3888         |             | 2.0                                                   |
| PA4786         |             | 2.0                                                   |
| PA4917         |             | 2.0                                                   |
| PA5025         | <i>metY</i> | 2.0                                                   |
| PA5083         |             | 2.0                                                   |
| PA5486         |             | 2.0                                                   |
| PA0001         | <i>dnaA</i> | 2.1                                                   |
| PA0080         |             | 2.1                                                   |
| PA0088         |             | 2.1                                                   |
| PA0400         |             | 2.1                                                   |
| PA0911         |             | 2.1                                                   |
| PA1730         |             | 2.1                                                   |
| PA1874         |             | 2.1                                                   |
| PA2159         |             | 2.1                                                   |
| PA2171         |             | 2.1                                                   |
| PA2302         |             | 2.1                                                   |
| PA2303         |             | 2.1                                                   |
| PA2329         |             | 2.1                                                   |
| PA2395         |             | 2.1                                                   |
| PA2403         |             | 2.1                                                   |
| PA2409         |             | 2.1                                                   |
| PA3442         |             | 2.1                                                   |
| PA3446         |             | 2.1                                                   |
| PA3682         |             | 2.1                                                   |
| PA3937         |             | 2.1                                                   |
| PA4709         |             | 2.1                                                   |
| PA5219         |             | 2.1                                                   |
| PA5557         | <i>atpH</i> | 2.1                                                   |

|                    |             |     |
|--------------------|-------------|-----|
| PA0100             |             | 2.2 |
| PA0345             |             | 2.2 |
| PA0715             |             | 2.2 |
| PA0758             |             | 2.2 |
| PA1148             | <i>toxA</i> | 2.2 |
| PA1300             |             | 2.2 |
| PA2062             |             | 2.2 |
| PA2113             |             | 2.2 |
| PA2169             |             | 2.2 |
| PA2175             |             | 2.2 |
| PA2179             |             | 2.2 |
| PA2656             |             | 2.2 |
| PA2702             |             | 2.2 |
| PA3041             |             | 2.2 |
| PA3617             | <i>recA</i> | 2.2 |
| PA3692             |             | 2.2 |
| PA3709             |             | 2.2 |
| PA3890             |             | 2.2 |
| PA4141             |             | 2.2 |
| PA4217             |             | 2.2 |
| PA4552             | <i>pilW</i> | 2.2 |
| PA5150             |             | 2.2 |
| PA5313             |             | 2.2 |
| ig 3545880 3545073 |             | 2.2 |
| ig 3649704 3648915 |             | 2.2 |
| PA0049             |             | 2.3 |
| PA0546             | <i>metK</i> | 2.3 |
| PA1150             | <i>pys2</i> | 2.3 |
| PA1246             | <i>aprD</i> | 2.3 |
| PA1302             |             | 2.3 |
| PA1732             |             | 2.3 |
| PA2019             | <i>mexX</i> | 2.3 |
| PA2147             | <i>katE</i> | 2.3 |
| PA2152             |             | 2.3 |
| PA2176             |             | 2.3 |
| PA2198             |             | 2.3 |
| PA2330             |             | 2.3 |
| PA2536             |             | 2.3 |
| PA3234             |             | 2.3 |
| PA3443             |             | 2.3 |
| PA4219             |             | 2.3 |
| PA4590             | <i>pra</i>  | 2.3 |
| PA4707             |             | 2.3 |
| PA5090             |             | 2.3 |
| PA5164             | <i>rmlC</i> | 2.3 |
| PA5265             |             | 2.3 |
| PA0079             |             | 2.4 |
| PA0910             |             | 2.4 |
| PA1318             | <i>cyoB</i> | 2.4 |
| PA2384             |             | 2.4 |
| PA3007             | <i>lexA</i> | 2.4 |
| PA3616             |             | 2.4 |
| PA3739             |             | 2.4 |
| PA4826             |             | 2.4 |

|                |             |     |
|----------------|-------------|-----|
| PA5161         | <i>rmlB</i> | 2.4 |
| PA5556         | <i>atpA</i> | 2.4 |
| PA0259         |             | 2.5 |
| PA0472         |             | 2.5 |
| PA0648         |             | 2.5 |
| PA1927         | <i>metE</i> | 2.5 |
| PA2066         |             | 2.5 |
| PA2138         |             | 2.5 |
| PA2180         |             | 2.5 |
| PA2385         |             | 2.5 |
| PA2386         | <i>pvdA</i> | 2.5 |
| PA2531         |             | 2.5 |
| PA3008         |             | 2.5 |
| PA3042         |             | 2.5 |
| PA3326         |             | 2.5 |
| PA3416         |             | 2.5 |
| PA3476         | <i>rhlI</i> | 2.5 |
| PA3661         |             | 2.5 |
| PA3905         |             | 2.5 |
| PA4359         |             | 2.5 |
| PA4916         |             | 2.5 |
| PA4934         | <i>rpsR</i> | 2.5 |
| PA4973         | <i>thiC</i> | 2.5 |
| Pae tRNA Arg s |             | 2.5 |
| PA0085         |             | 2.6 |
| PA0096         |             | 2.6 |
| PA0182         |             | 2.6 |
| PA1509         |             | 2.6 |
| PA1914         |             | 2.6 |
| PA2139         |             | 2.6 |
| PA2142         |             | 2.6 |
| PA2163         |             | 2.6 |
| PA2195         | <i>hcnC</i> | 2.6 |
| PA3293         |             | 2.6 |
| PA3487         |             | 2.6 |
| PA4553         | <i>pilX</i> | 2.6 |
| PA4932         | <i>rplI</i> | 2.6 |
| PA1000         |             | 2.7 |
| PA1508         |             | 2.7 |
| PA3444         |             | 2.7 |
| PA4175         |             | 2.7 |
| PA4469         |             | 2.7 |
| PA4550         | <i>fimU</i> | 2.7 |
| PA5089         |             | 2.7 |
| PA0084         |             | 2.8 |
| PA0087         |             | 2.8 |
| PA0391         |             | 2.8 |
| PA1319         | <i>cyoC</i> | 2.8 |
| PA1912         |             | 2.8 |
| PA2144         | <i>glgP</i> | 2.8 |
| PA2153         | <i>glgB</i> | 2.8 |
| PA2162         |             | 2.8 |
| PA2164         |             | 2.8 |
| PA2383         |             | 2.8 |

|                    |              |     |
|--------------------|--------------|-----|
| PA2538             |              | 2.8 |
| PA3290             |              | 2.8 |
| PA3292             |              | 2.8 |
| PA3866             |              | 2.8 |
| PA5087             |              | 2.8 |
| PA5266             |              | 2.8 |
| PA0086             |              | 2.9 |
| PA0149             |              | 2.9 |
| PA0547             |              | 2.9 |
| PA0802             |              | 2.9 |
| PA1002             | <i>phnB</i>  | 2.9 |
| PA2114             |              | 2.9 |
| PA2160             |              | 2.9 |
| PA2167             |              | 2.9 |
| PA2288             |              | 2.9 |
| PA2540             |              | 2.9 |
| PA2657             |              | 2.9 |
| PA3486             |              | 2.9 |
| PA4470             | <i>fumCI</i> | 2.9 |
| PA4635             |              | 2.9 |
| PA5088             |              | 2.9 |
| PA2170             |              | 3.0 |
| PA2408             |              | 3.0 |
| PA3160             | <i>wzz</i>   | 3.0 |
| PA4206             | <i>mexH</i>  | 3.0 |
| PA4227             | <i>pchR</i>  | 3.0 |
| PA0101             |              | 3.1 |
| PA2158             |              | 3.1 |
| PA2452             |              | 3.1 |
| PA3291             |              | 3.1 |
| PA3938             |              | 3.1 |
| PA4221             | <i>fptA</i>  | 3.1 |
| PA4468             | <i>sodM</i>  | 3.1 |
| PA0098             |              | 3.2 |
| PA0263             | <i>HcpC</i>  | 3.2 |
| PA0997             |              | 3.2 |
| PA1301             |              | 3.2 |
| PA2173             |              | 3.2 |
| PA4134             |              | 3.2 |
| PA4357             |              | 3.2 |
| PA4781             |              | 3.2 |
| PA5220             |              | 3.2 |
| PA0122             |              | 3.3 |
| PA1510             |              | 3.3 |
| PA1891             |              | 3.3 |
| PA2401             |              | 3.3 |
| PA2414             |              | 3.3 |
| PA3154             | <i>wzy</i>   | 3.3 |
| PA3460             |              | 3.3 |
| PA4224             |              | 3.3 |
| PA4226             | <i>pchE</i>  | 3.3 |
| PA4230             | <i>pchB</i>  | 3.3 |
| PA4551             | <i>pilV</i>  | 3.3 |
| ig 5130767 5131427 |              | 3.3 |

|        |              |     |
|--------|--------------|-----|
| PA0996 |              | 3.4 |
| PA0097 |              | 3.5 |
| PA2165 |              | 3.5 |
| PA2415 |              | 3.5 |
| PA2427 |              | 3.5 |
| PA2451 |              | 3.5 |
| PA3445 |              | 3.5 |
| PA4231 | <i>pchA</i>  | 3.5 |
| PA1245 |              | 3.6 |
| PA1911 |              | 3.6 |
| PA2193 | <i>hcnA</i>  | 3.6 |
| PA2399 | <i>pvdD</i>  | 3.6 |
| PA2400 |              | 3.6 |
| PA2424 |              | 3.6 |
| PA3294 |              | 3.6 |
| PA4218 |              | 3.6 |
| PA0643 |              | 3.7 |
| PA0647 |              | 3.7 |
| PA1661 |              | 3.7 |
| PA4229 | <i>pchC</i>  | 3.7 |
| PA0261 |              | 3.8 |
| PA0262 |              | 3.8 |
| PA0613 |              | 3.8 |
| PA0999 | <i>fabH1</i> | 3.8 |
| PA2067 |              | 3.8 |
| PA2172 |              | 3.8 |
| PA2402 |              | 3.8 |
| PA2425 |              | 3.8 |
| PA2539 |              | 3.8 |
| PA4777 |              | 3.8 |
| PA5470 |              | 3.8 |
| PA0260 |              | 3.9 |
| PA2178 |              | 3.9 |
| PA0621 |              | 4.0 |
| PA4583 |              | 4.0 |
| PA1001 | <i>phnA</i>  | 4.1 |
| PA1511 |              | 4.1 |
| PA2140 |              | 4.1 |
| PA2377 |              | 4.1 |
| PA2513 | <i>antB</i>  | 4.1 |
| PA4133 |              | 4.1 |
| PA4225 | <i>pchF</i>  | 4.1 |
| PA4584 |              | 4.1 |
| PA1657 |              | 4.2 |
| PA2141 |              | 4.2 |
| PA2411 |              | 4.2 |
| PA4205 |              | 4.2 |
| PA4223 |              | 4.2 |
| PA4782 |              | 4.2 |
| PA1671 | <i>stk1</i>  | 4.3 |
| PA2300 | <i>chiC</i>  | 4.3 |
| PA2413 |              | 4.3 |
| PA4220 |              | 4.3 |
| PA5383 |              | 4.3 |



|        |             |     |
|--------|-------------|-----|
| PA2412 |             | 4.4 |
| PA5471 |             | 4.4 |
| PA1639 |             | 4.5 |
| PA4358 |             | 4.5 |
| PA0641 |             | 4.6 |
| PA0640 |             | 4.7 |
| PA2151 |             | 4.7 |
| PA4228 | <i>pchD</i> | 4.7 |
| PA4933 |             | 4.7 |
| PA0645 |             | 4.8 |
| PA1663 |             | 4.8 |
| PA0646 |             | 4.9 |
| PA2194 | <i>hcnB</i> | 4.9 |
| PA4467 |             | 4.9 |
| PA0624 |             | 5.0 |
| PA1656 |             | 5.0 |
| PA1662 |             | 5.1 |
| PA1670 | <i>stp1</i> | 5.1 |
| PA2033 |             | 5.1 |
| PA3557 |             | 5.1 |
| PA0626 |             | 5.2 |
| PA1871 | <i>lasA</i> | 5.2 |
| PA3553 |             | 5.2 |
| PA0998 |             | 5.3 |
| PA0612 |             | 5.4 |
| PA0627 |             | 5.4 |
| PA1658 |             | 5.4 |
| PA0615 |             | 5.5 |
| PA0623 |             | 5.5 |
| PA0628 |             | 5.5 |
| PA0728 |             | 5.5 |
| PA0636 |             | 5.6 |
| PA3556 |             | 5.6 |
| PA0614 |             | 5.7 |
| PA0616 |             | 5.8 |
| PA0617 |             | 5.8 |
| PA0633 |             | 5.8 |
| PA0637 |             | 5.9 |
| PA0619 |             | 6.0 |
| PA0634 |             | 6.0 |
| PA0620 |             | 6.1 |
| PA0639 |             | 6.2 |
| PA0642 |             | 6.3 |
| PA1669 |             | 6.3 |
| PA0629 |             | 6.4 |
| PA0638 |             | 6.5 |
| PA3555 |             | 6.5 |
| PA0618 |             | 6.6 |
| PA0644 |             | 6.6 |
| PA4776 |             | 6.7 |
| PA0622 |             | 6.8 |
| PA0631 |             | 6.9 |
| PA0635 |             | 6.9 |
| PA1668 |             | 7.0 |

|                  |              |      |
|------------------|--------------|------|
| PA0625           |              | 7.2  |
| PA2034           |              | 7.2  |
| PA0630           |              | 7.3  |
| PA3554           |              | 7.3  |
| PA3578           |              | 7.3  |
| PA4582           |              | 7.4  |
| PA1130           |              | 7.5  |
| PA1660           |              | 7.5  |
| PA1666           |              | 7.5  |
| PA1667           |              | 7.6  |
| PA1131           |              | 7.8  |
| PA1665           |              | 7.9  |
| PA0632           |              | 8.0  |
| PA1905           |              | 8.2  |
| ig 788253 789144 |              | 8.4  |
| PA1179           | <i>phoP</i>  | 8.9  |
| PA4210           |              | 9.1  |
| PA3724           | <i>lasB</i>  | 9.2  |
| PA1659           |              | 9.6  |
| PA1664           |              | 9.6  |
| PA3361           |              | 9.8  |
| PA2570           | <i>palL</i>  | 10.3 |
| PA3558           |              | 10.6 |
| PA3559           |              | 10.6 |
| PA2068           |              | 11.0 |
| PA3331           |              | 11.4 |
| PA4775           |              | 12.4 |
| PA2069           |              | 12.7 |
| PA1904           |              | 13.5 |
| PA3329           |              | 13.5 |
| PA1903           |              | 13.7 |
| PA1901           |              | 14.2 |
| PA3328           |              | 14.2 |
| PA3330           |              | 14.6 |
| PA0727           |              | 15.1 |
| PA3334           |              | 15.1 |
| PA3336           |              | 15.1 |
| PA1559           |              | 15.5 |
| PA1560           |              | 15.7 |
| PA3335           |              | 16.7 |
| PA3327           |              | 17.1 |
| PA3332           |              | 17.8 |
| PA3333           | <i>fabH2</i> | 18.1 |
| PA4211           |              | 19.6 |
| PA1902           |              | 19.8 |
| PA0722           |              | 26.7 |
| PA3478           | <i>rhlB</i>  | 29.2 |
| PA0723           | <i>coaB</i>  | 34.1 |
| PA4774           |              | 34.1 |
| PA0724           |              | 35.5 |
| PA0726           |              | 35.8 |
| PA0720           |              | 38.3 |
| PA4773           |              | 41.1 |
| PA0717           |              | 41.4 |

|        |             |      |
|--------|-------------|------|
| PA0725 |             | 41.9 |
| PA3479 | <i>rhlA</i> | 43.7 |
| PA1178 | <i>oprH</i> | 47.5 |
| PA0718 |             | 50.6 |
| PA0719 |             | 54.6 |
| PA0721 |             | 78.8 |

## Supplementary Figures

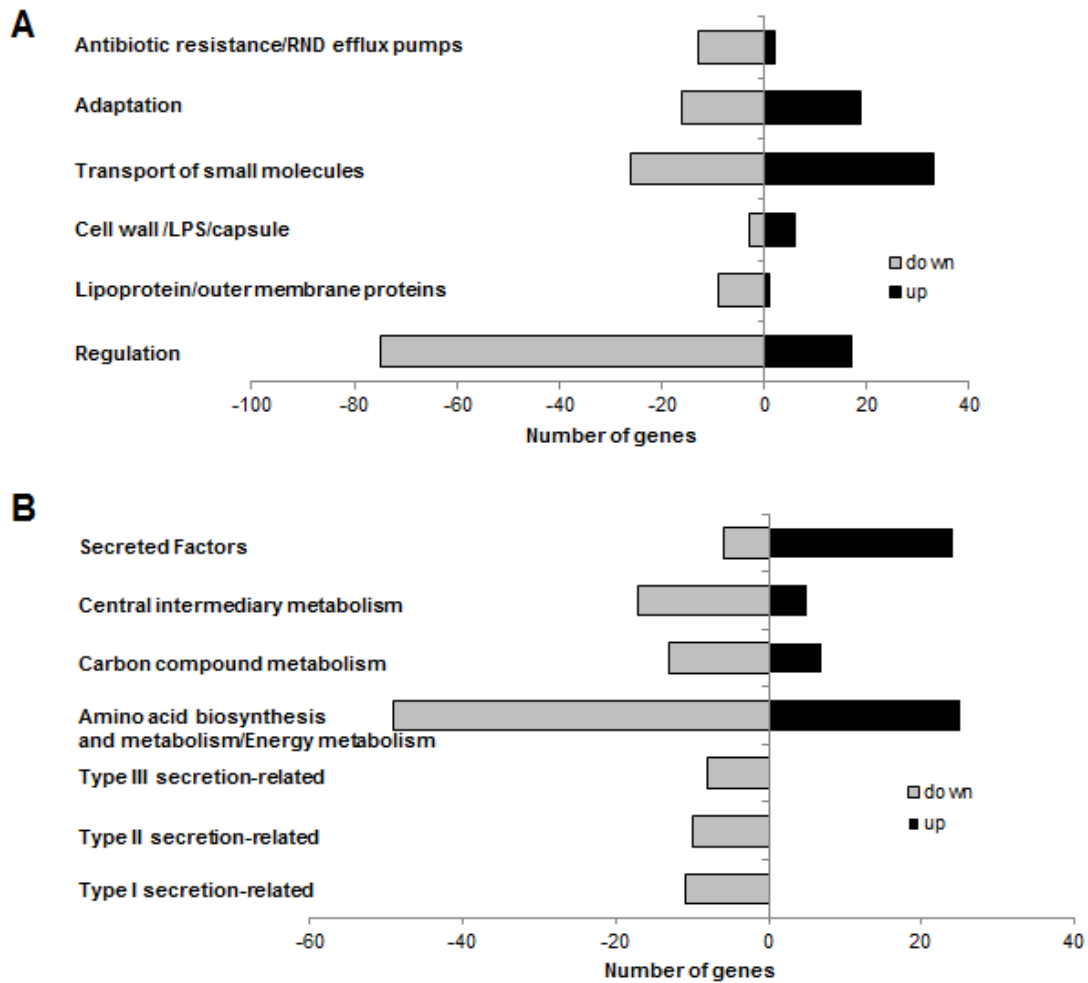

**Suppl. Figure S1. Genome-wide transcriptional profiling in *P. aeruginosa* PAO1 and  $\Delta brlR$  biofilms using Genomic Microarray.** (A, B) Overview of differentially expressed genes based on selected categories. The complete data set is provided in Supplemental Tables S1-S2. down, less expressed in  $\Delta brlR$  biofilms compared to wild type biofilms; up, higher expression levels were detected in  $\Delta brlR$  biofilms compared to wild type biofilms.

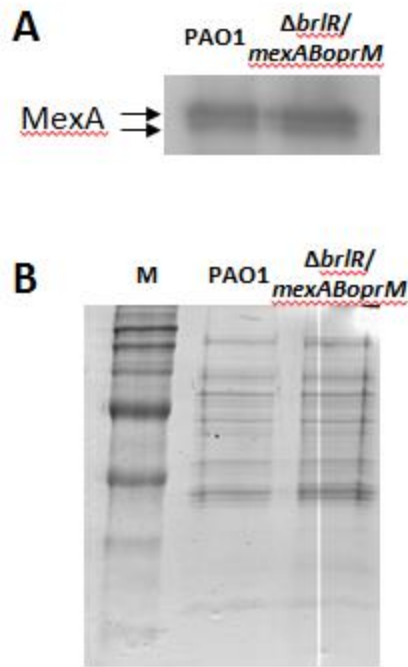

**Suppl. Figure S2. Plasmid-borne expression of *mexAB-oprM* in  $\Delta brlR$  restores MexA levels to that observed in *P. aeruginosa* PAO1 wild type biofilms.** (A) Immunoblot probed with anti-MexA antibodies. (B) SDS-gel image demonstrating comparable loading of total cells extract used for immunoblot analysis. SDS-gel was stained post immunoblotting. A total of 10  $\mu$ g of total cell extract was loaded per lane and strain.
